# Supplementary material
Source: publisher figshare collection journal article supplement (https://frontiersin.figshare.com/ndownloader/files/25766042)

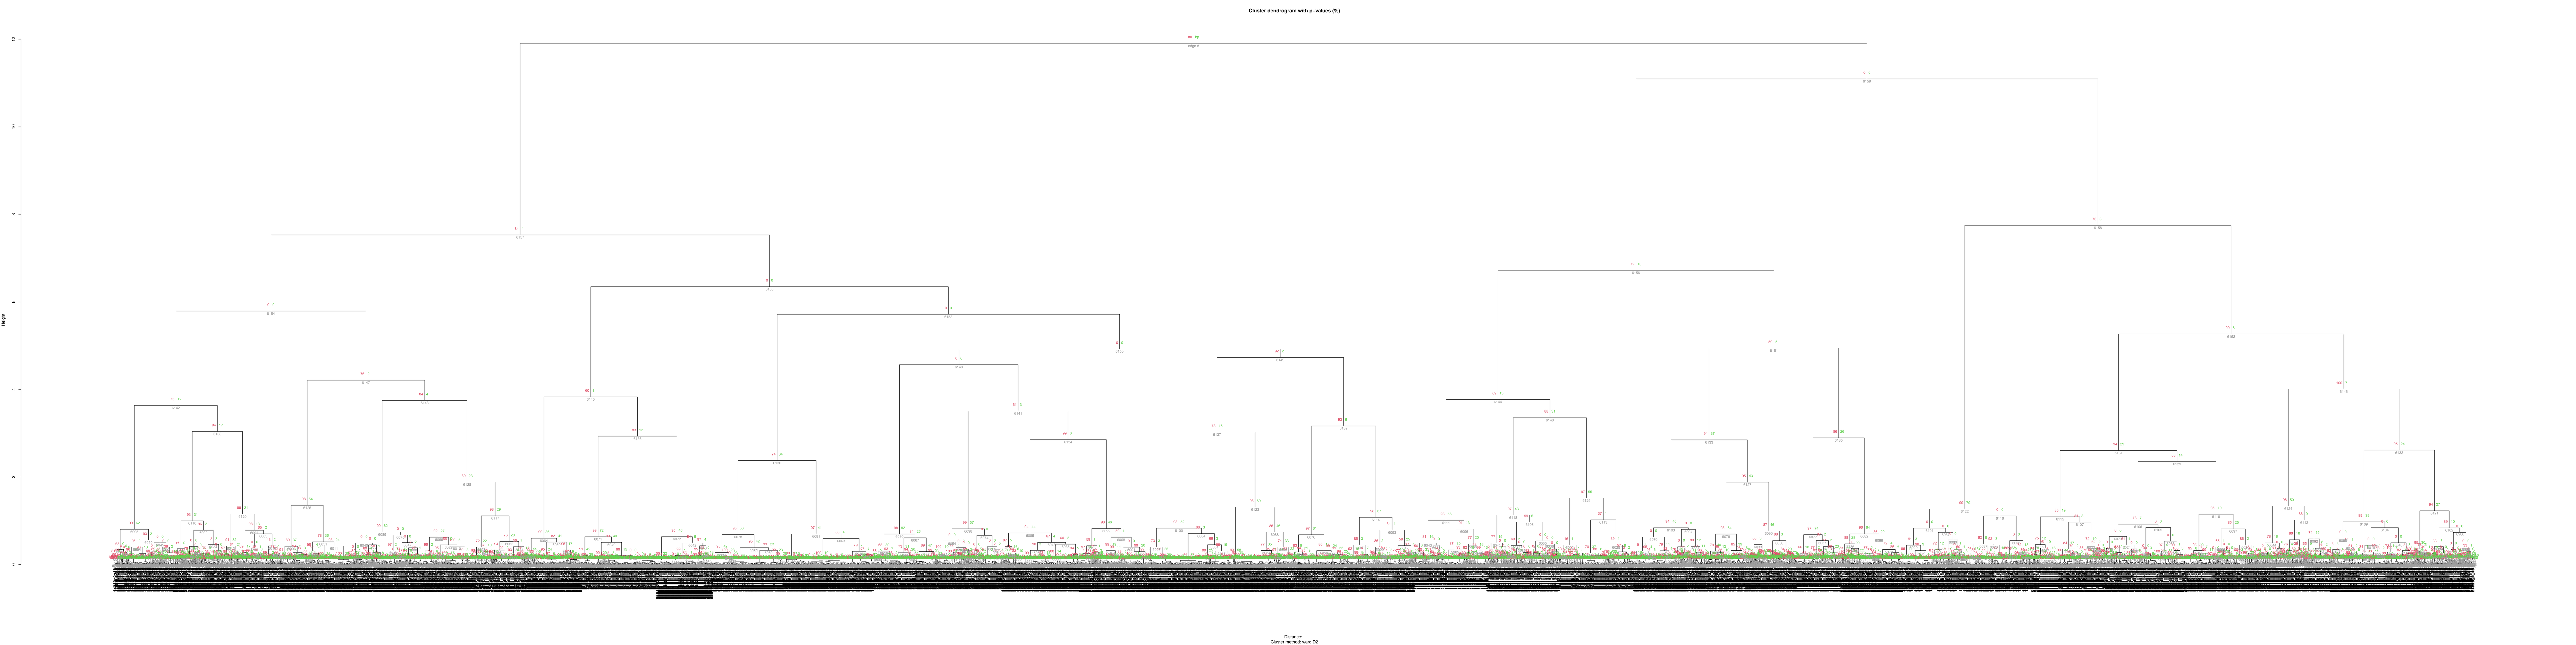

Supplement: Supplementary file 1 [file 25766042]

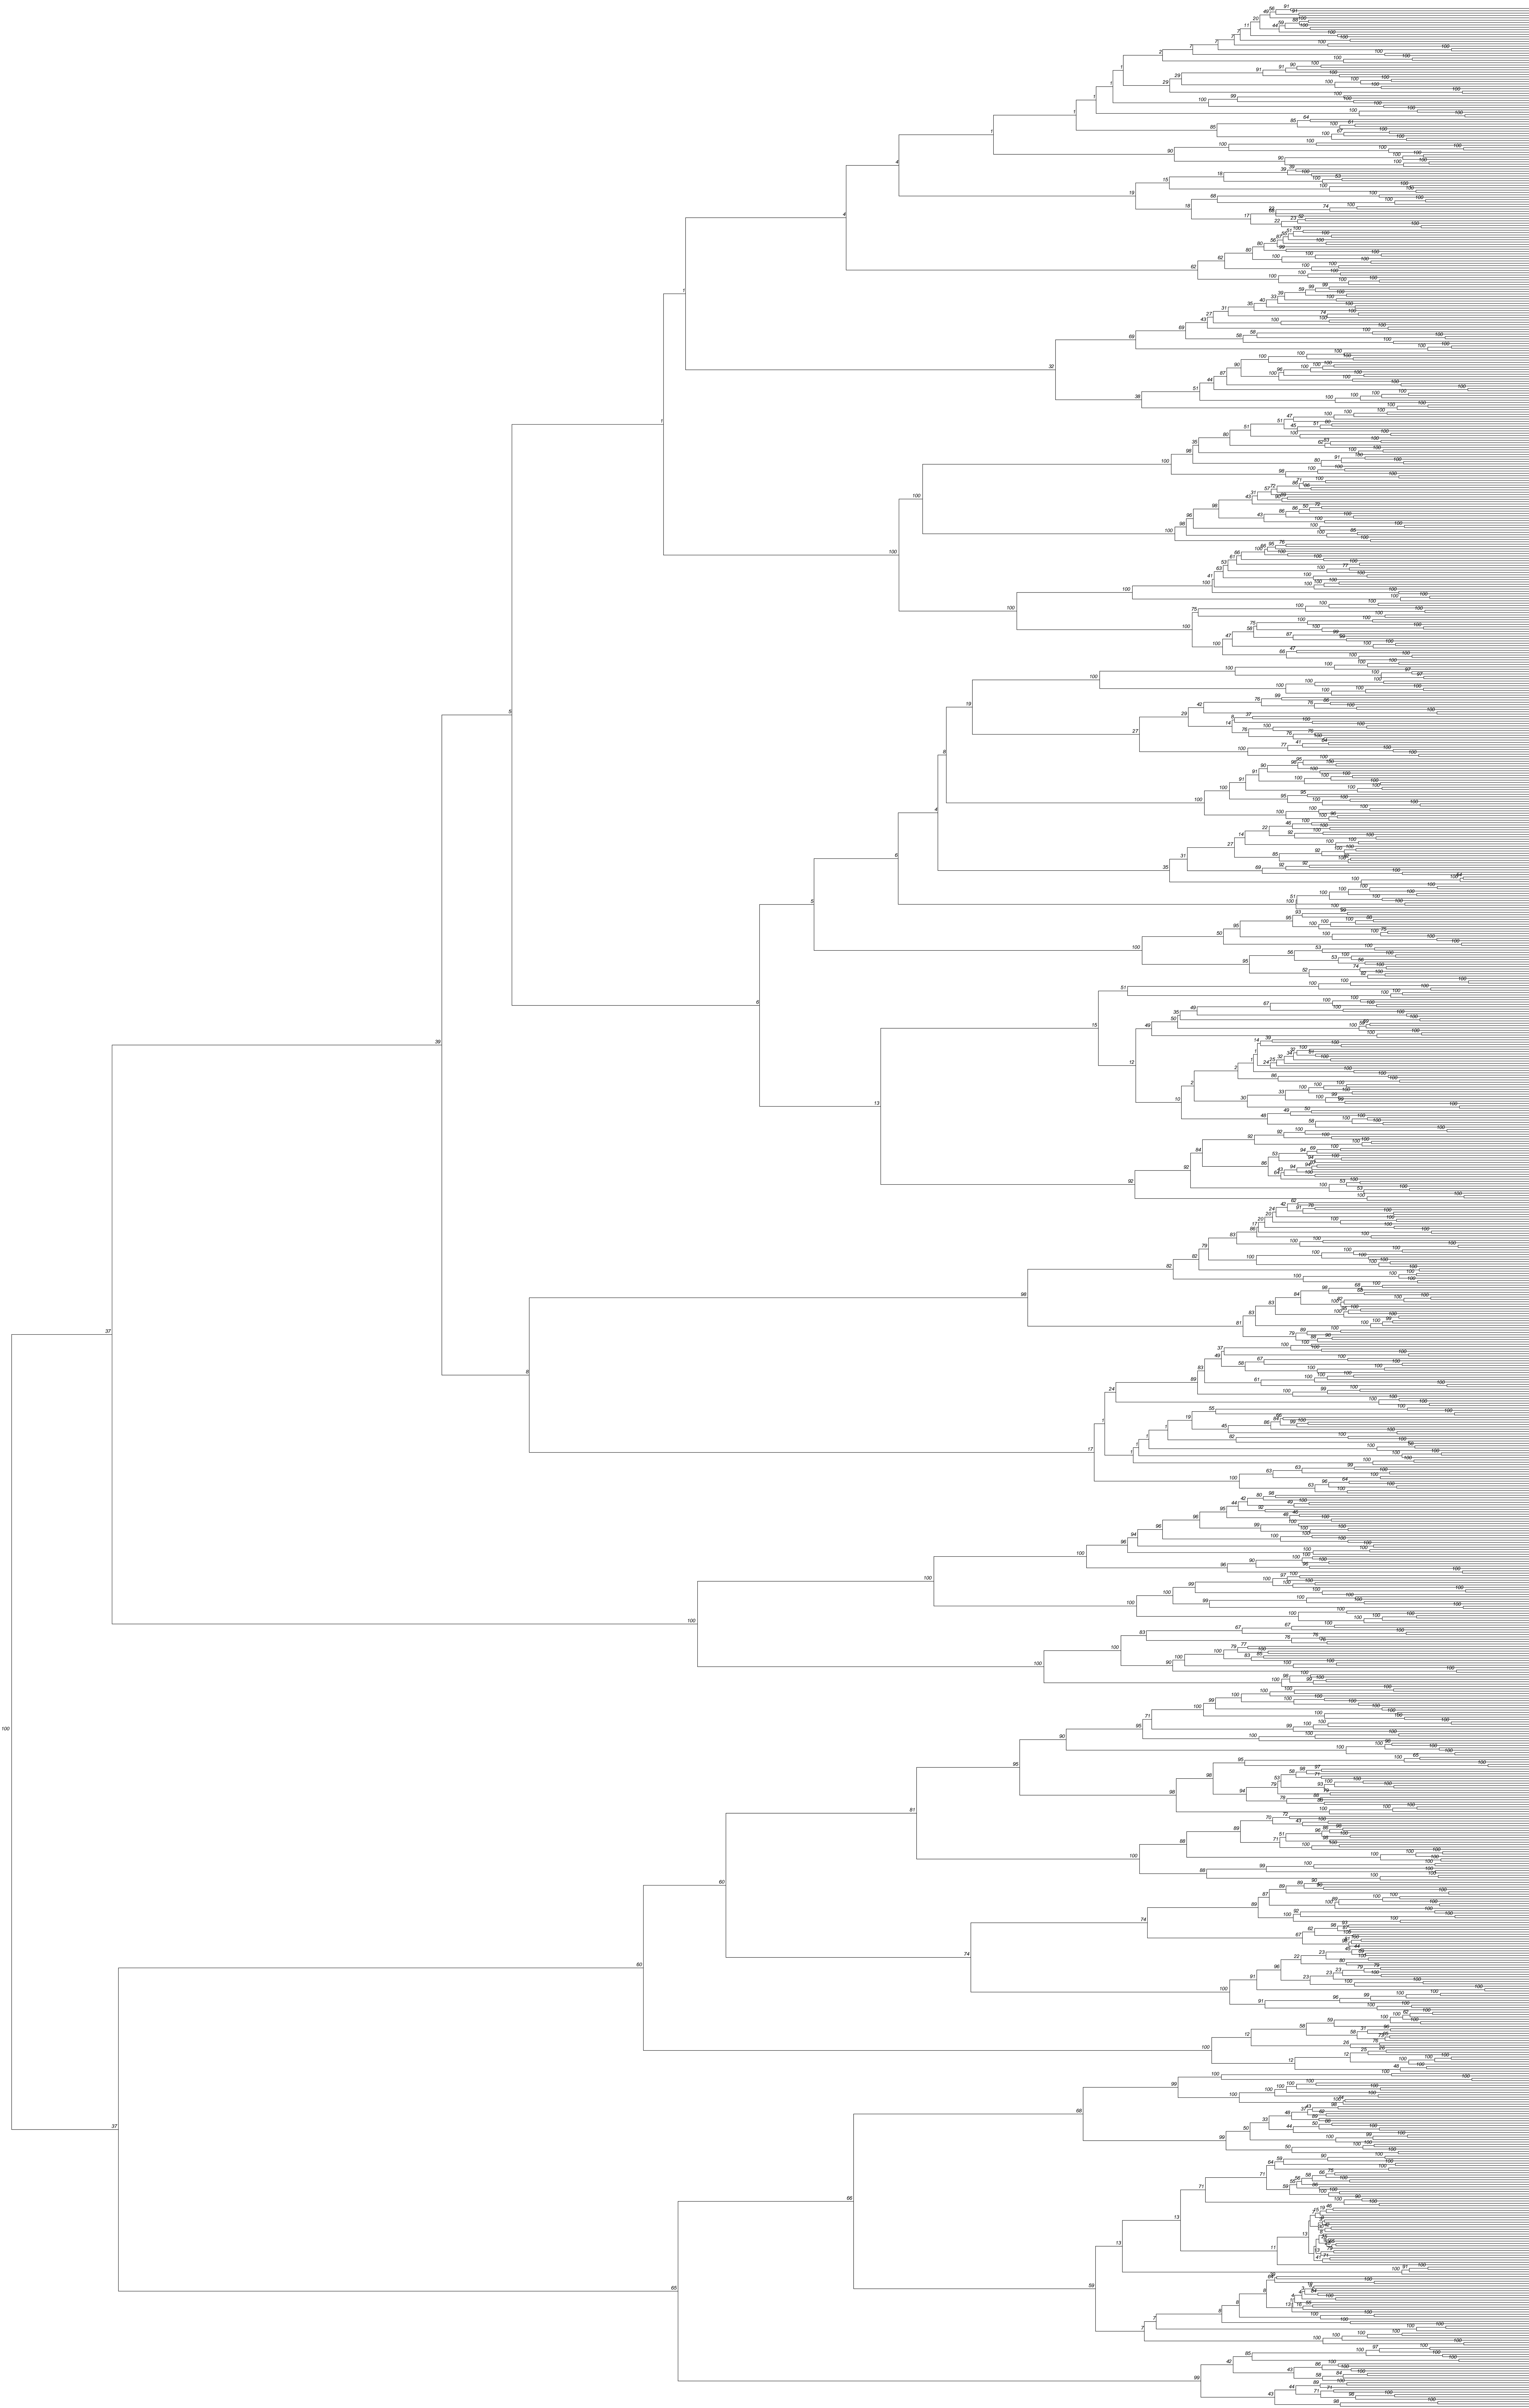

Supplement: Supplementary file 3 [file 25766042]

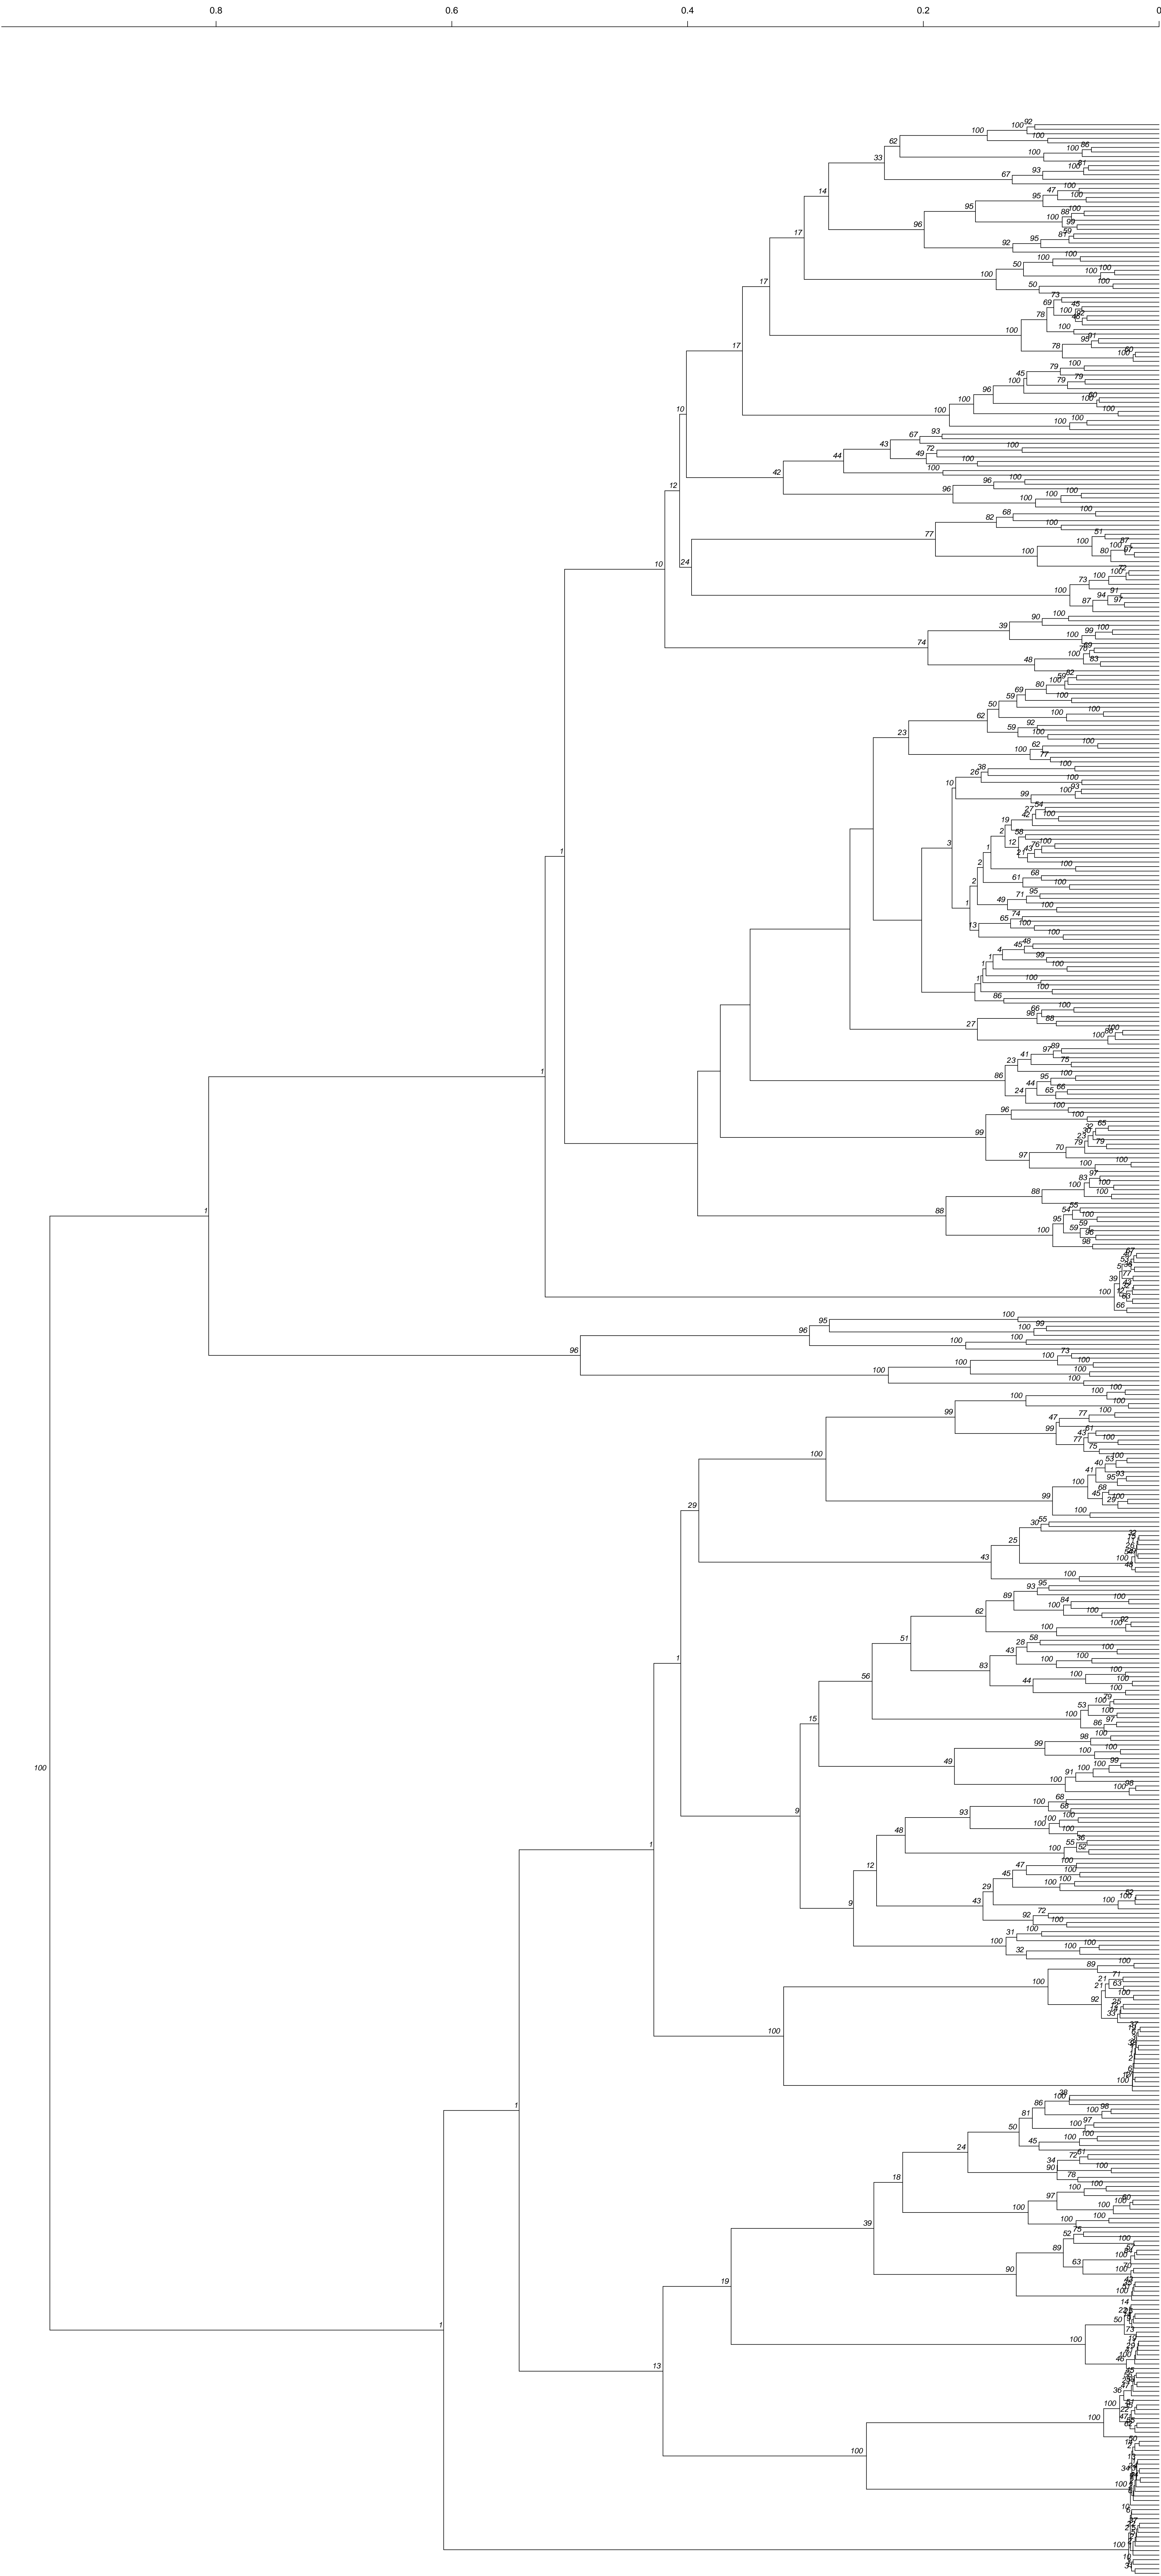

Supplement: Supplementary file 7 [file 25766042]

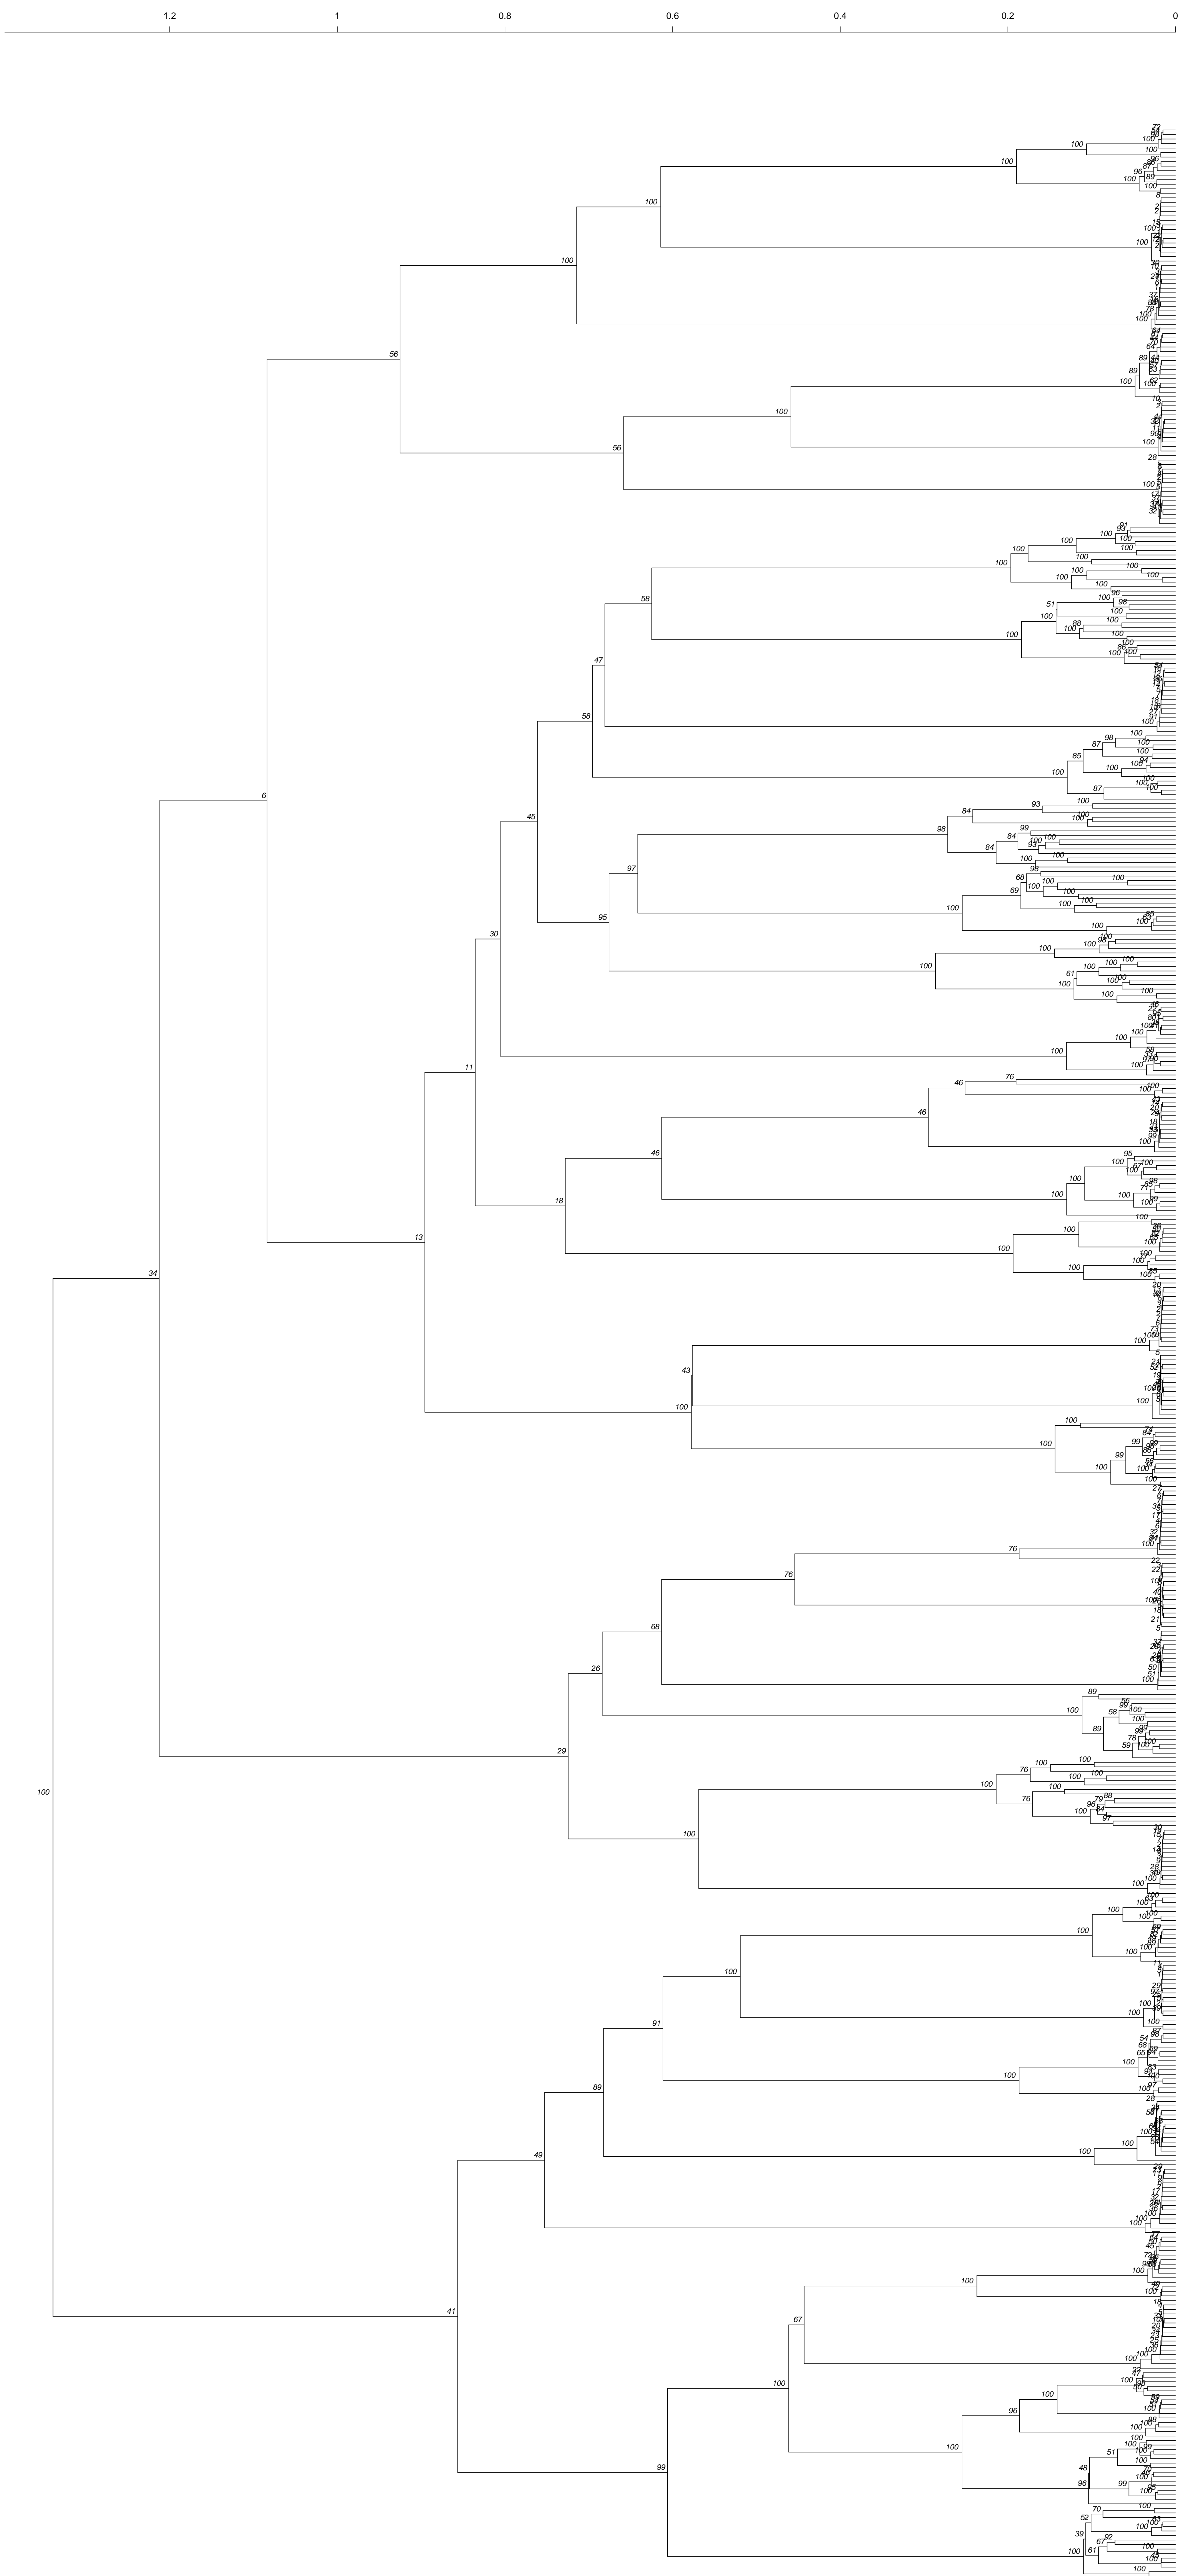

Supplement: Supplementary file 8 [file 25766042]

Cluster dendrogram with p-values (%)

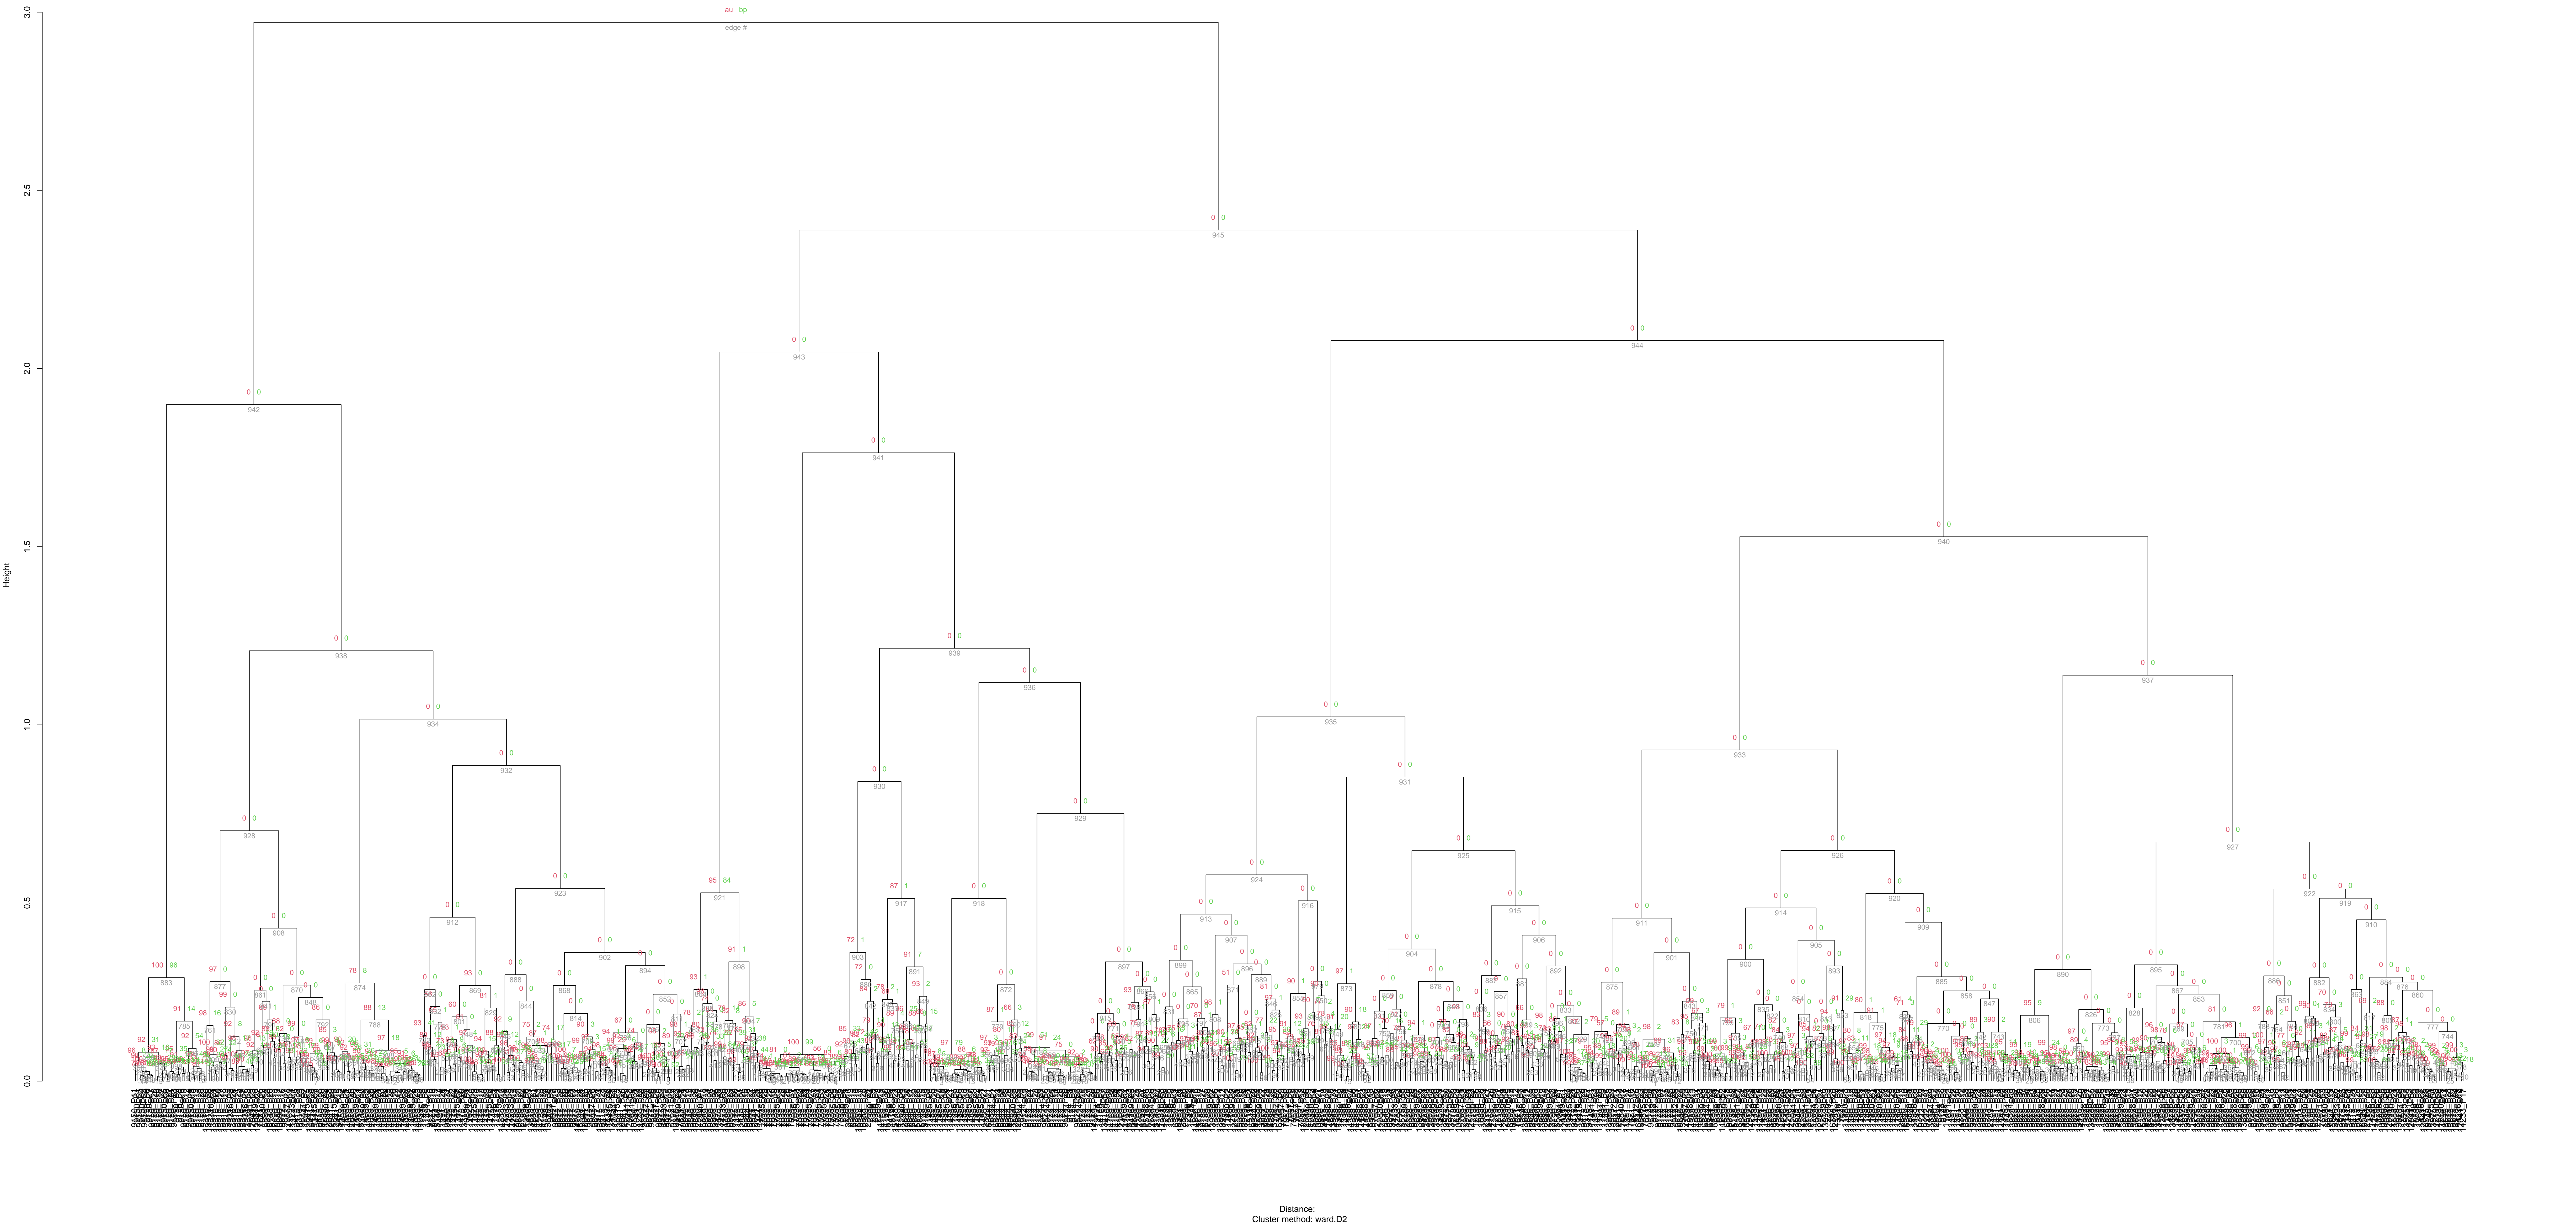

Supplement: Supplementary file 9 [file 25766042]
